# Supplementary material for: Application of 1H HR-MAS NMR-Based Metabolite Fingerprinting of Marine Microalgae
Source: MDPI journal article supplement (doi:10.3390/metabo13020202), 2023-01-30
Supplement: s1 [file s1]

## Supplementary Files

# Application of $^1\text{H}$ HR-MAS NMR-based metabolite fingerprinting of marine microalgae

Carolina da Silva Canielles Caprara <sup>1</sup>, Tatiane Ksyvickas Mathias <sup>2</sup>, Maria de Fátima C. Santos <sup>2</sup>, Marcelo G. M. D'Oca <sup>2</sup>, Caroline Da R. M. D'Oca <sup>2</sup>, Fabio Roselet <sup>3</sup>, Paulo Cesar Abreu <sup>3†</sup> and Daniela Fernandes Ramos <sup>1,\*</sup>

†This work is dedicated to the memory of our dear colleague and mentor, Professor Paulo Cesar Abreu, who passed away on July 19, 2022.

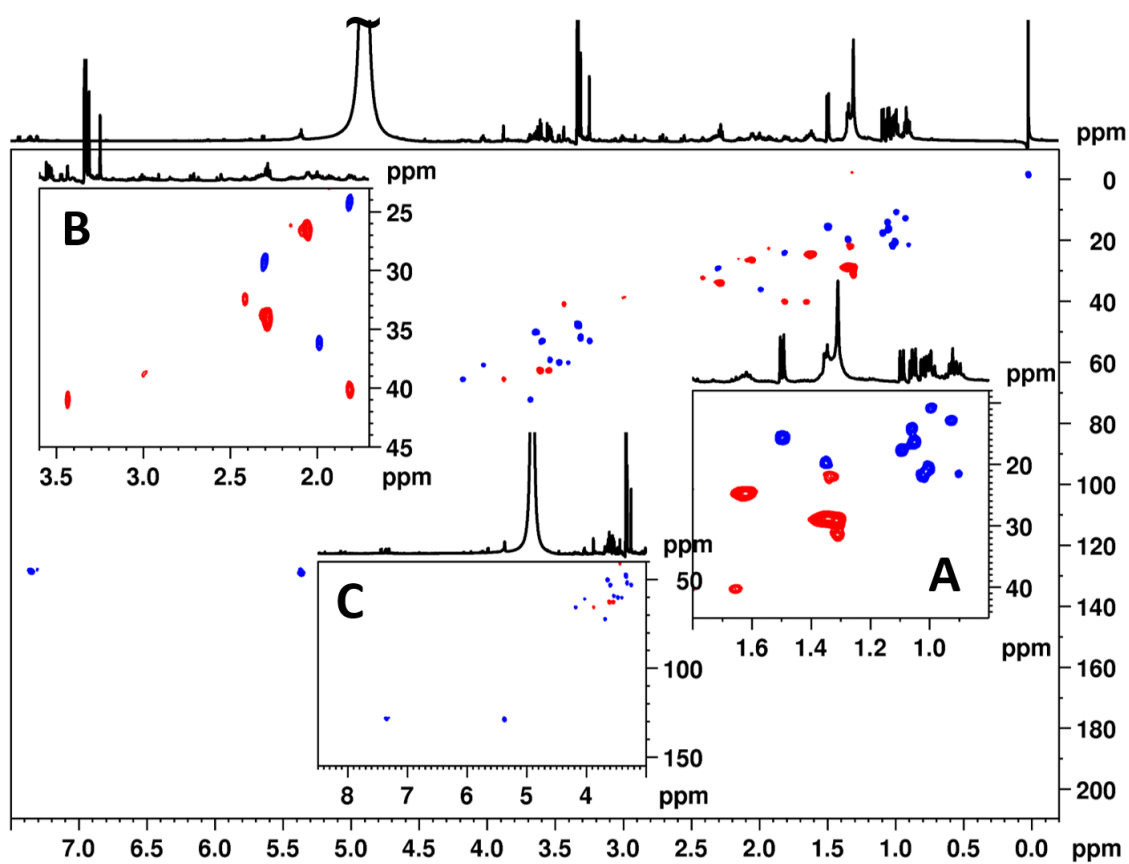

Figure S1.  $^1\text{H}$ - $^{13}\text{C}$  one-bond correlation map from multiplicity edited HSQC NMR experiment acquired from *Conticribra weissflogii* ( $^1\text{H}$  and  $^{13}\text{C}$ , 600 and 150 MHz,  $\text{D}_2\text{O}$ ) – regions A, B, and C.

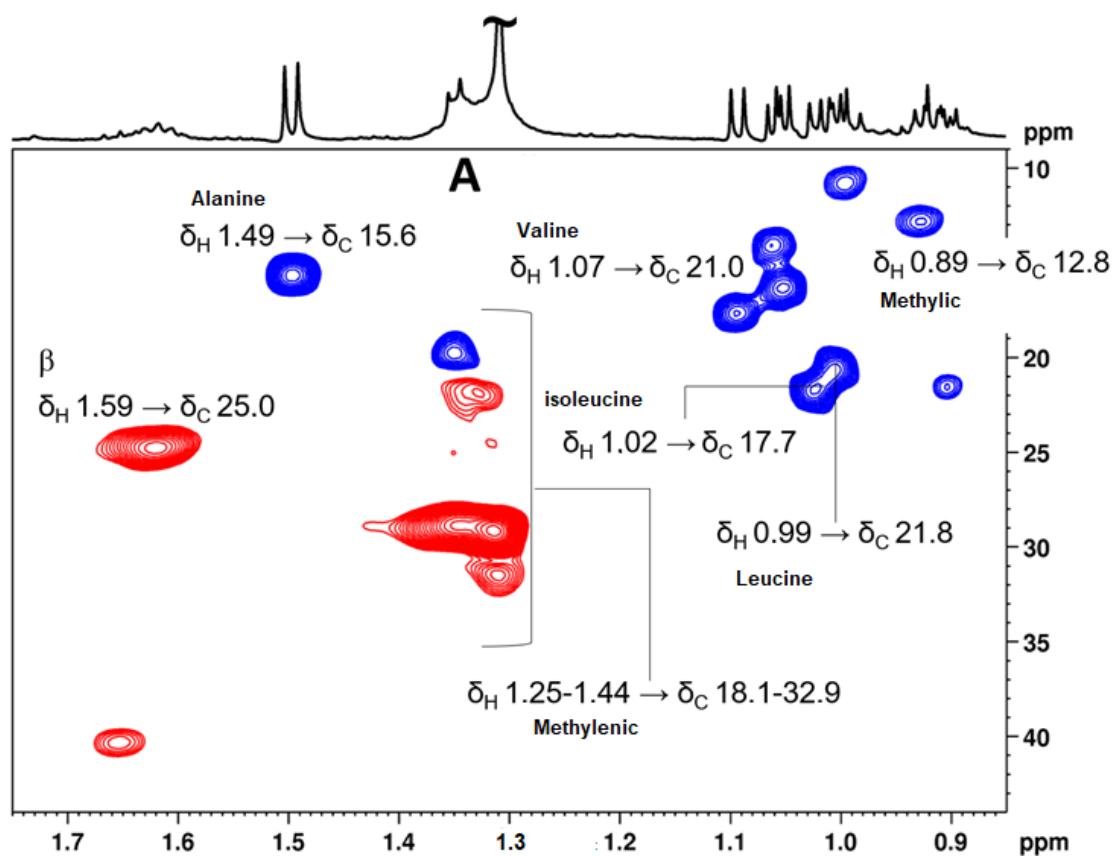

Figure S2. Ampliation from  $^1\text{H}$ - $^{13}\text{C}$  one-bond correlation map from multiplicity edited HSQC NMR experiment acquired from *Conticribra weissflogii* ( $^1\text{H}$  and  $^{13}\text{C}$ , 600 and 150 MHz,  $\text{D}_2\text{O}$ ) – region A.

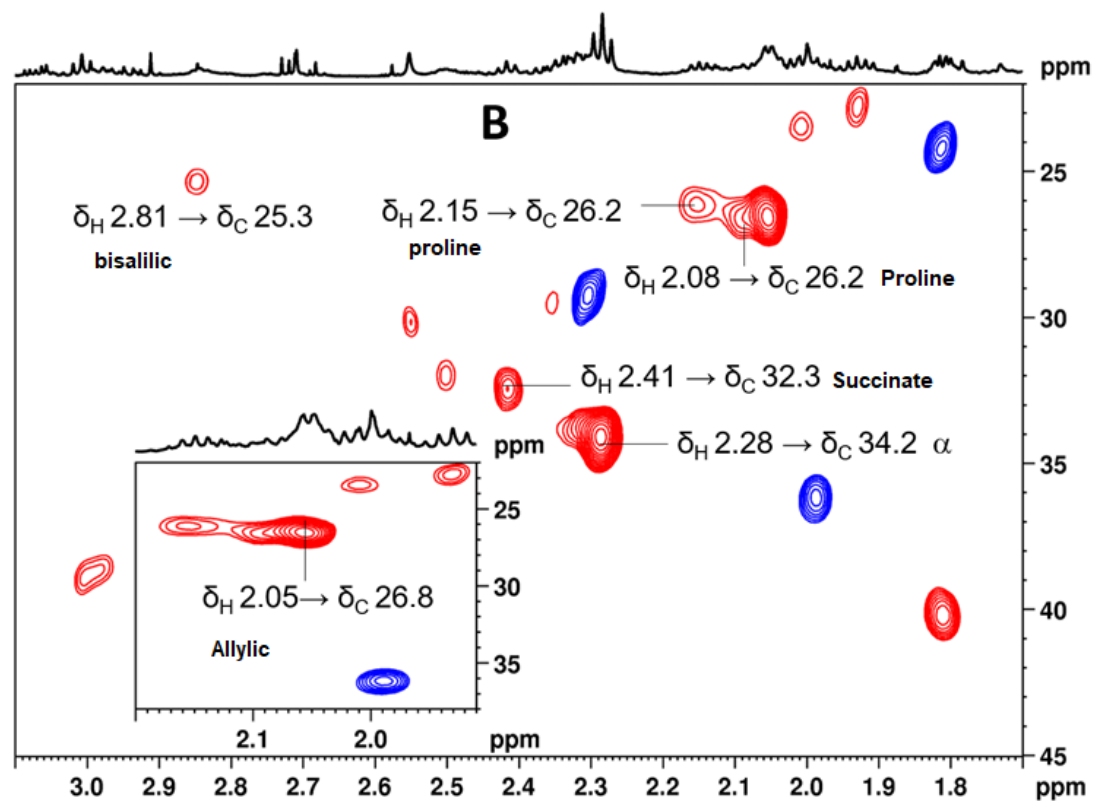

Figure S3. Ampliation from  $^1\text{H}$ - $^{13}\text{C}$  one-bond correlation map from multiplicity edited HSQC NMR experiment acquired from *Conticribra weissflogii* ( $^1\text{H}$  and  $^{13}\text{C}$ , 600 and 150 MHz,  $\text{D}_2\text{O}$ ) – region B.

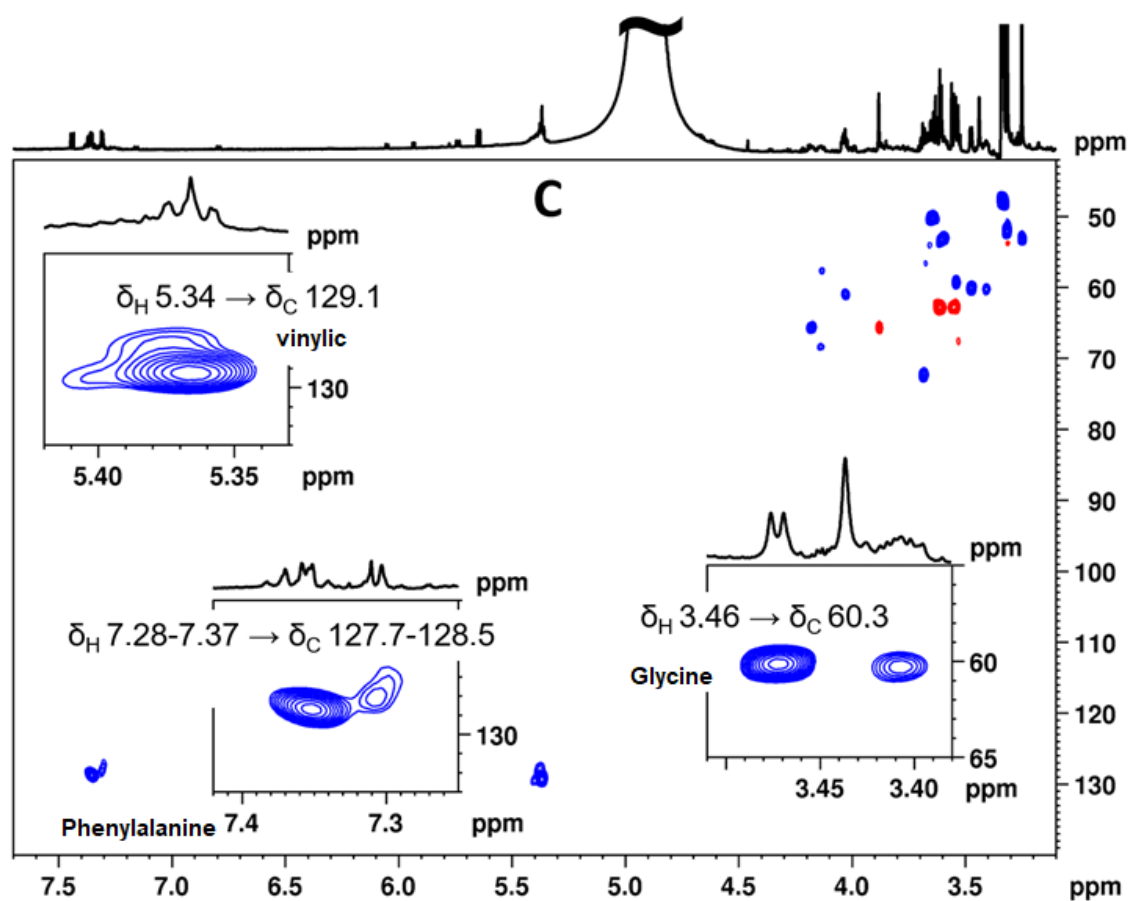

Figure S4. Ampliation from  $^1\text{H}$ - $^{13}\text{C}$  one-bond correlation map from multiplicity edited HSQC NMR experiment acquired from *Conticribra weissflogii* ( $^1\text{H}$  and  $^{13}\text{C}$ , 600 and 150 MHz,  $\text{D}_2\text{O}$ ) – region C.

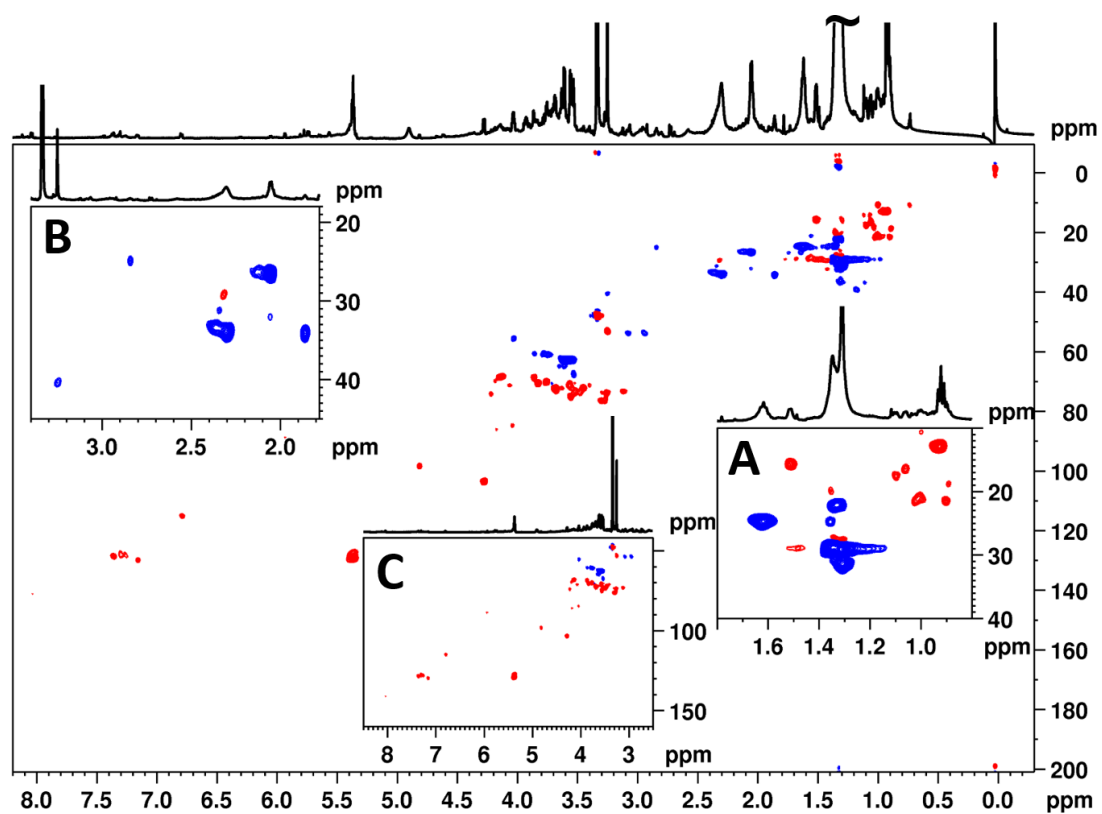

Figure S5.  $^1\text{H}$ - $^{13}\text{C}$  one-bond correlation map from multiplicity edited HSQC NMR experiment acquired from *Chaetoceros muelleri* ( $^1\text{H}$  and  $^{13}\text{C}$ , 600.13 and 150.92 MHz,  $\text{CD}_3\text{OD}$ ) – regions A, B, and C.

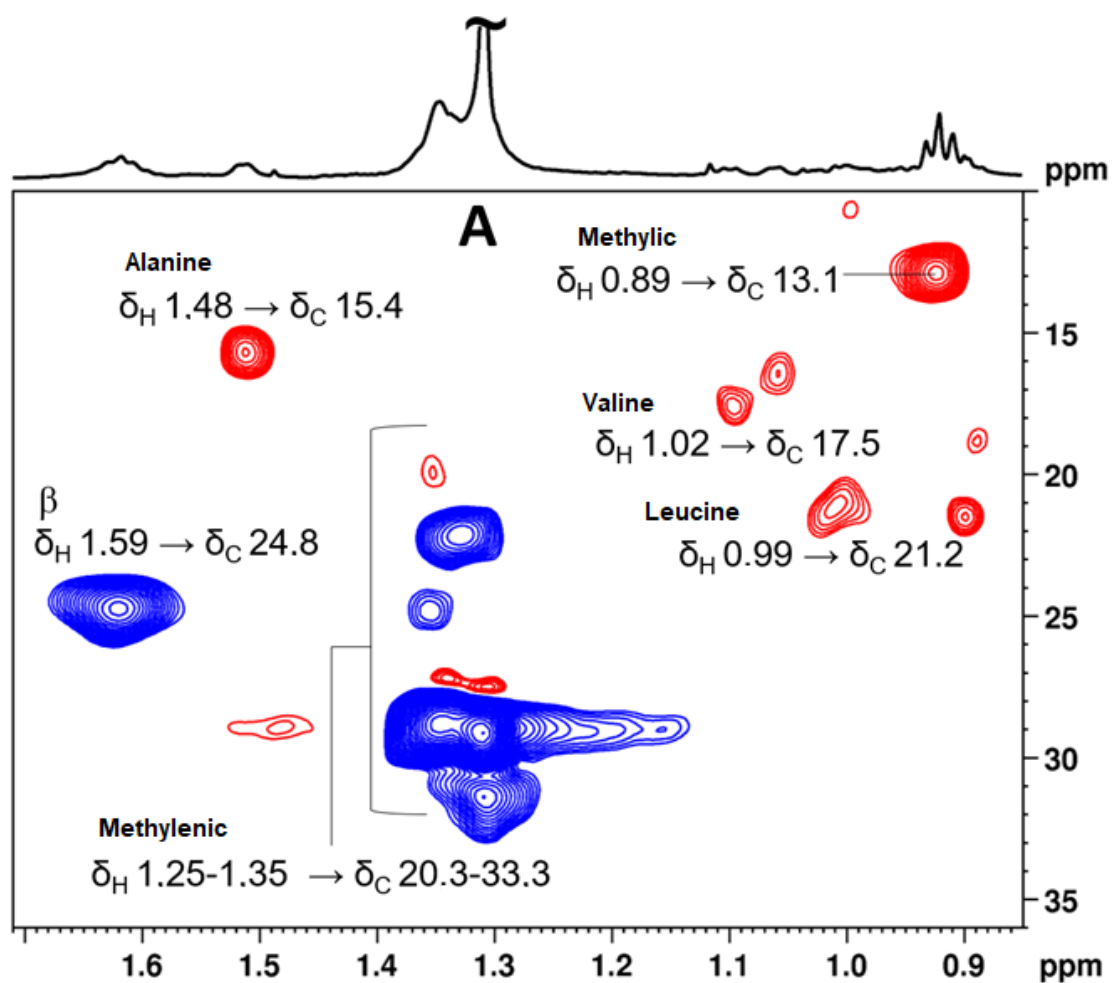

Figure S6. Ampliation from  $^1\text{H}$ - $^{13}\text{C}$  one-bond correlation map from multiplicity edited HSQC NMR experiment acquired from *Chaetoceros muelleri* ( $^1\text{H}$  and  $^{13}\text{C}$ , 600.13 and 150.92 MHz,  $\text{CD}_3\text{OD}$ ) – region A.

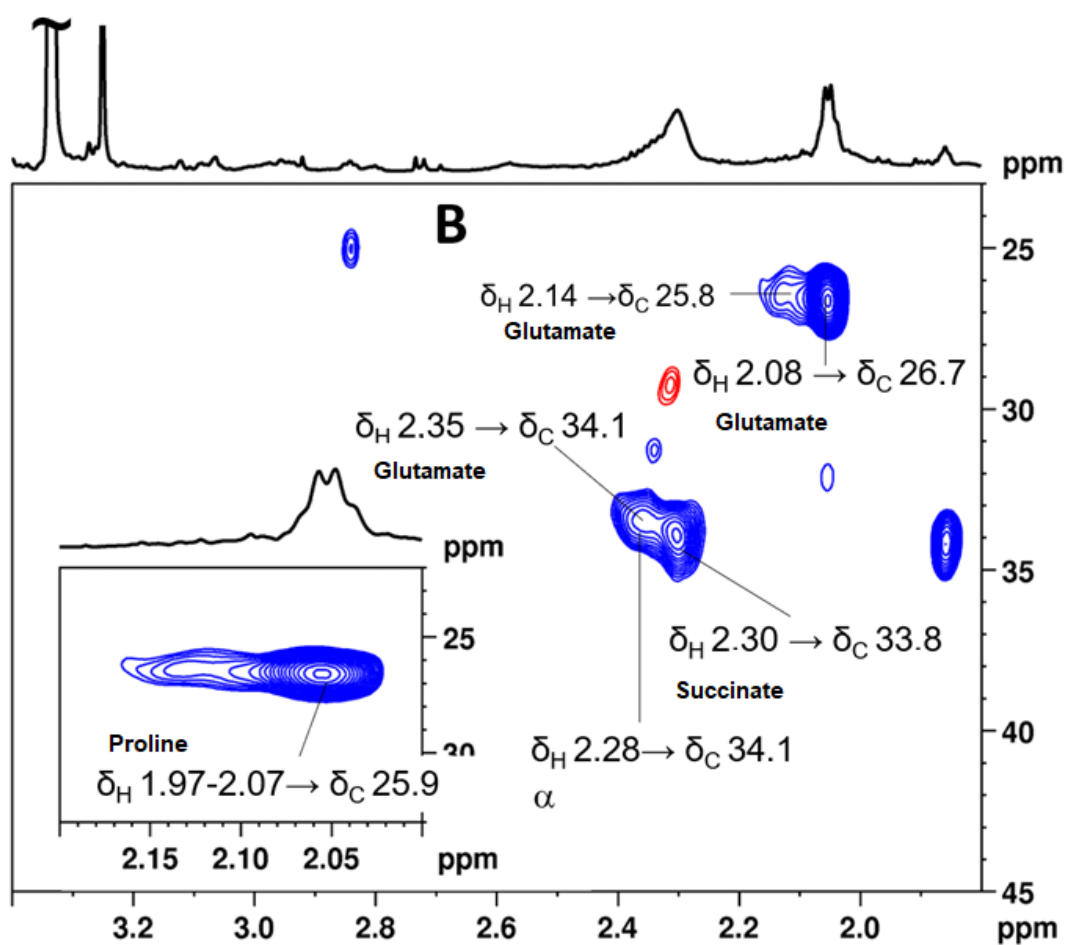

Figure S7. Ampliation from  $^1H$ - $^{13}C$  one-bond correlation map from multiplicity edited HSQC NMR experiment acquired from *Chaetoceros muelleri* ( $^1H$  and  $^{13}C$ , 600.13 and 150.92 MHz,  $CD_3OD$ ) – region B.

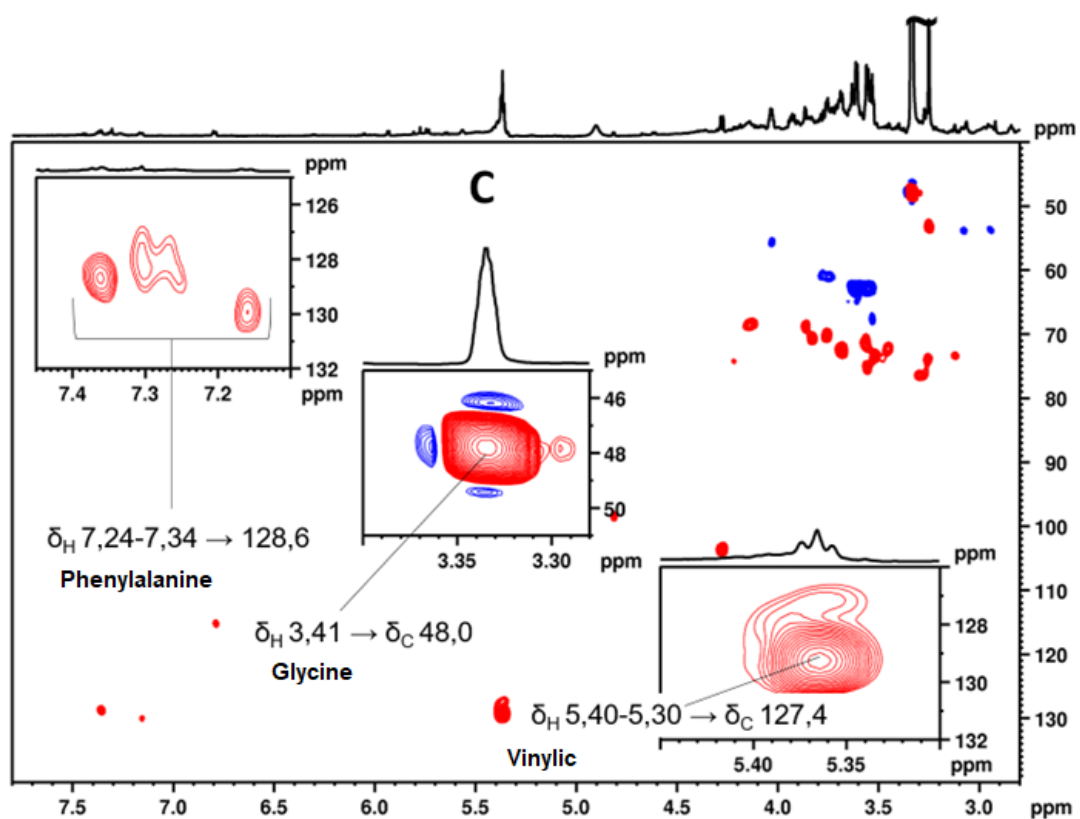

Figure S8. Ampliation from  $^1\text{H}$ - $^{13}\text{C}$  one-bond correlation map from multiplicity edited HSQC NMR experiment acquired from *Chaetoceros muelleri* ( $^1\text{H}$  and  $^{13}\text{C}$ , 600.13 and 150.92 MHz,  $\text{CD}_3\text{OD}$ ) – region C.

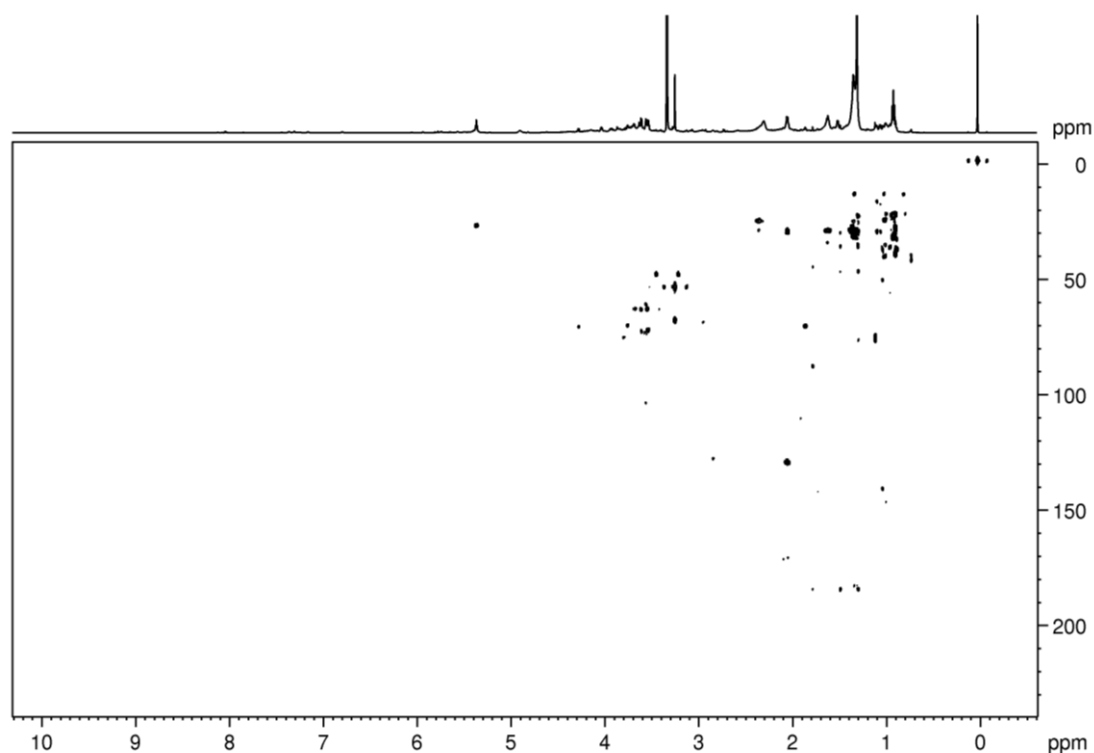

Figure S9.  $^1\text{H}$ - $^{13}\text{C}$  long-distance correlation map HMBC NMR experiment acquired from *Chaetoceros muelleri* ( $^1\text{H}$  and  $^{13}\text{C}$ , 600.13 and 150.92 MHz,  $\text{CD}_3\text{OD}$ ).

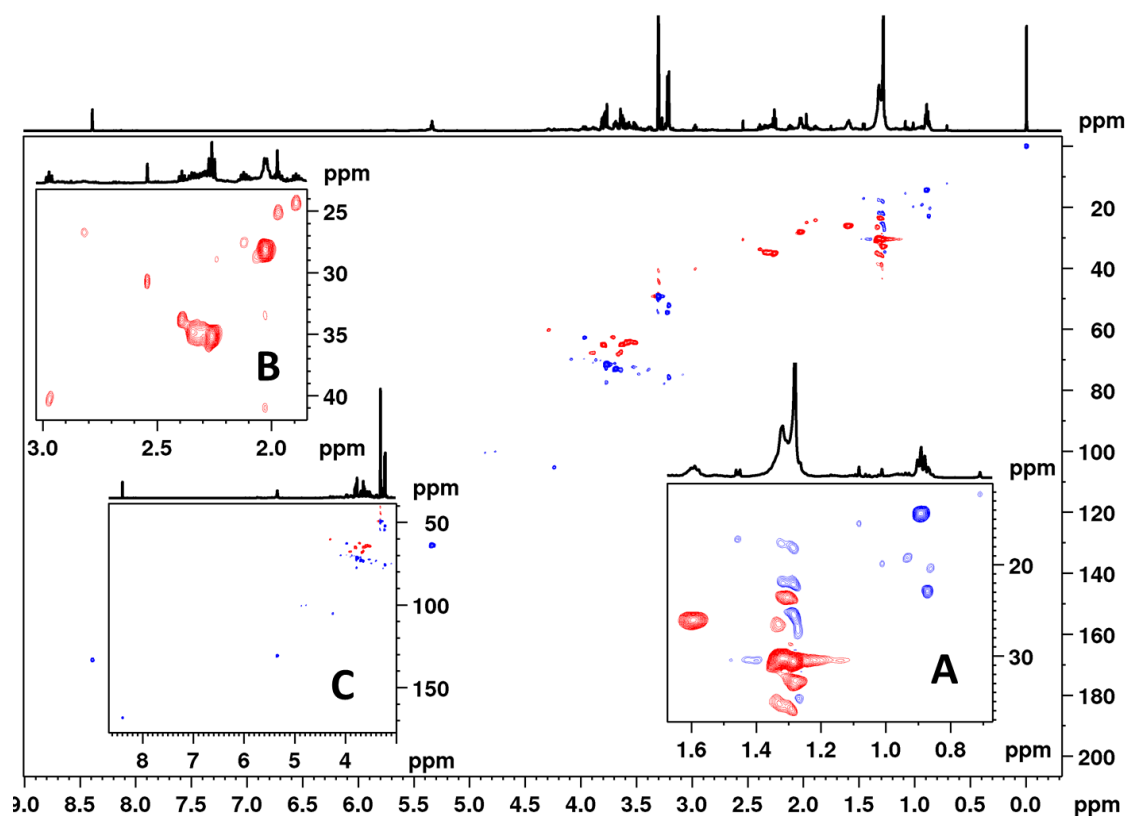

Figure S10.  $^1\text{H}$ - $^{13}\text{C}$  one-bond correlation map from multiplicity edited HSQC NMR experiment acquired from *Nannochloropsis oceanica* ( $^1\text{H}$  and  $^{13}\text{C}$ , 600.13 and 150.92 MHz,  $\text{CD}_3\text{OD}$ ) – regions A, B, and C.

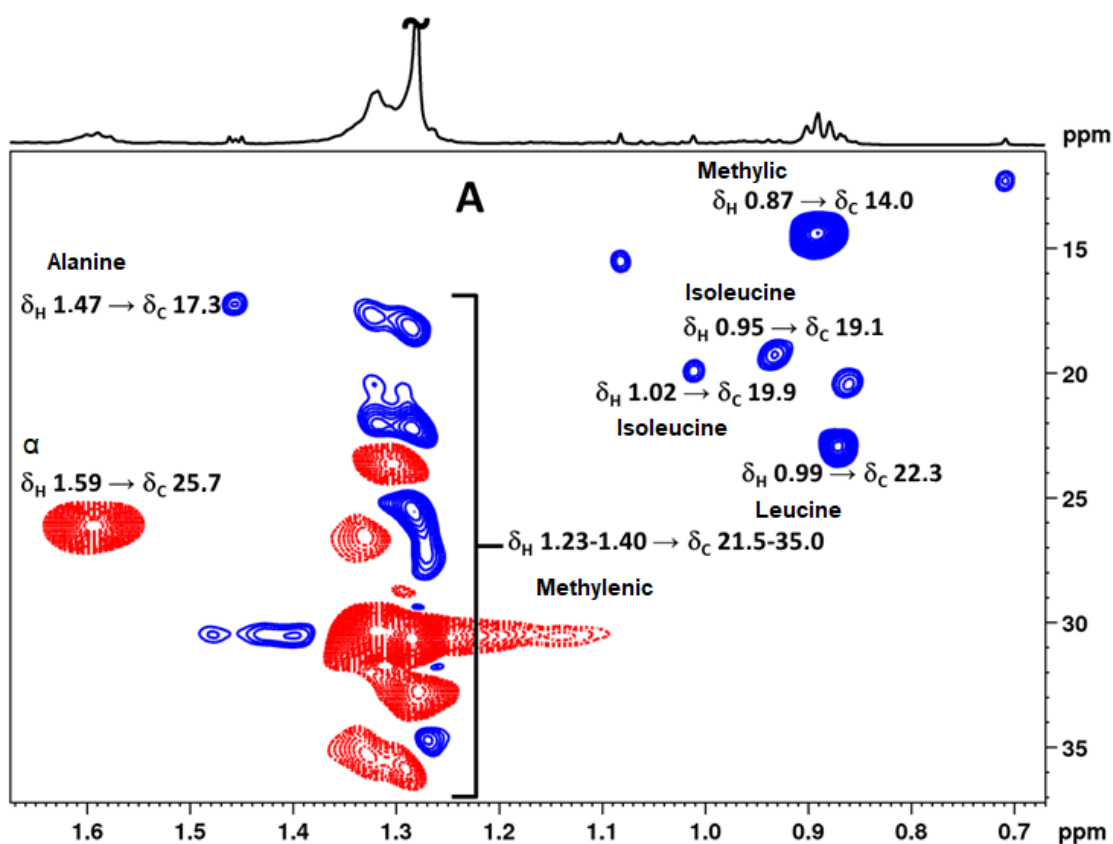

Figure S11. Amplification from  $^1\text{H}$ - $^{13}\text{C}$  one-bond correlation map from multiplicity edited HSQC NMR experiment acquired from *Nannochloropsis oceanica* ( $^1\text{H}$  and  $^{13}\text{C}$ , 600.13 and 150.92 MHz,  $\text{CD}_3\text{OD}$ ) – region A.



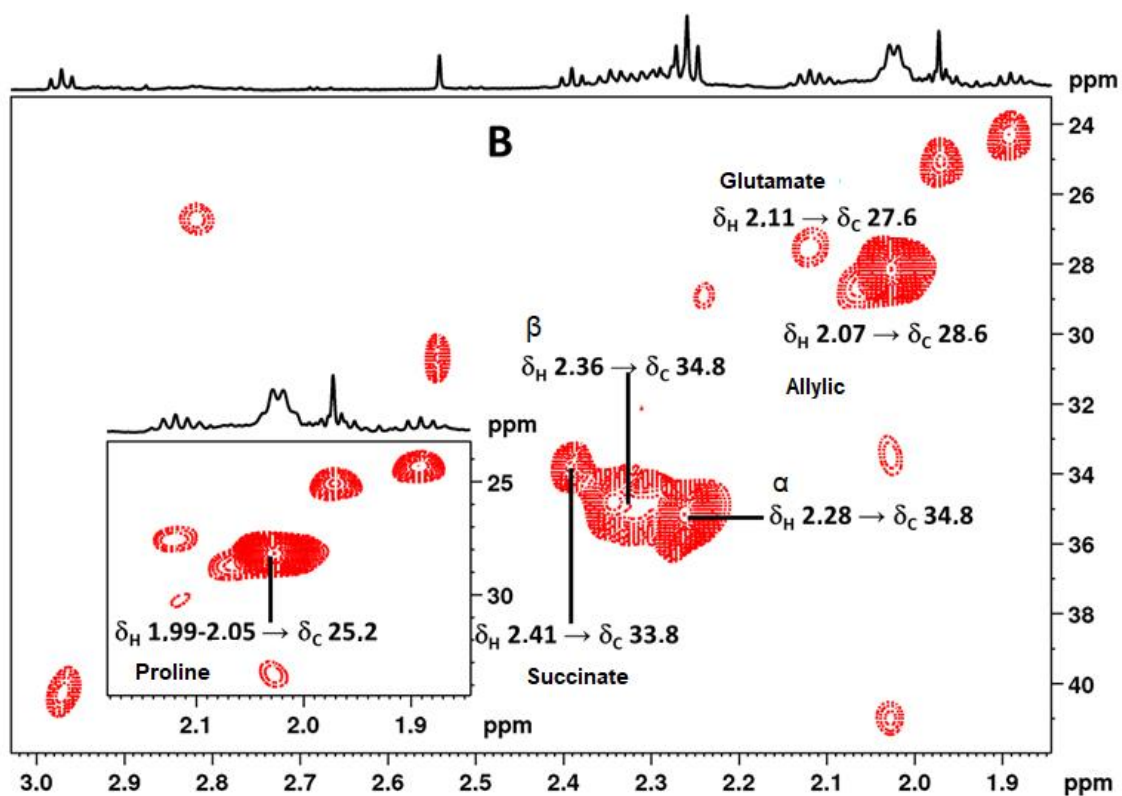

Figure S12. Ampliation from  $^1\text{H}$ - $^{13}\text{C}$  one-bond correlation map from multiplicity edited HSQC NMR experiment acquired from *Nannochloropsis oceanica* ( $^1\text{H}$  and  $^{13}\text{C}$ , 600.13 and 150.92 MHz,  $\text{CD}_3\text{OD}$ ) – region B.

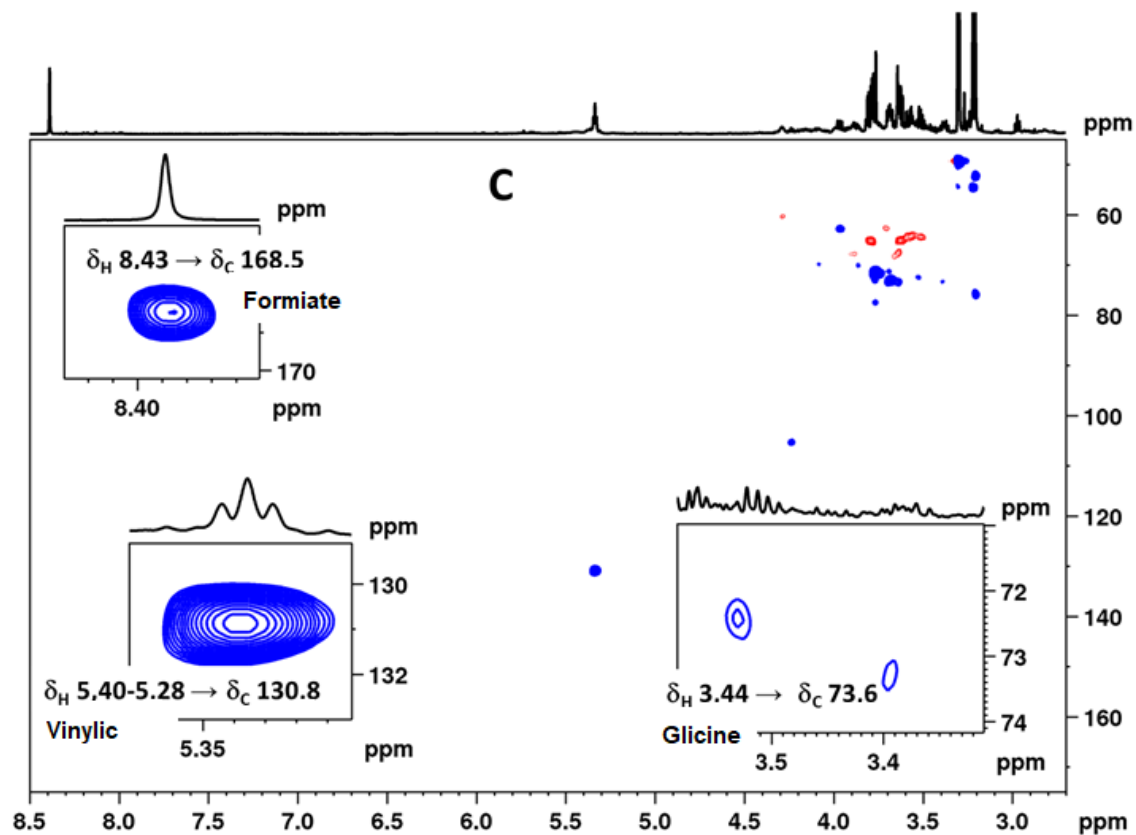

Figure S13. Ampliation from  $^1\text{H}$ - $^{13}\text{C}$  one-bond correlation map from multiplicity edited HSQC NMR experiment acquired from *Nannochloropsis oceanica* ( $^1\text{H}$  and  $^{13}\text{C}$ , 600.13 and 150.92 MHz,  $\text{CD}_3\text{OD}$ ) – region C.
